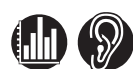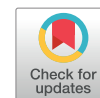

# Cardiovascular, Renal, and Metabolic Outcomes of Dapagliflozin Versus Placebo in a Primary Cardiovascular Prevention Cohort: Analyses From DECLARE-TIMI 58

Diabetes Care 2021;44:1159–1167 | <https://doi.org/10.2337/dc20-2492>

Avivit Cahn,<sup>1</sup> Itamar Raz,<sup>1</sup>  
Lawrence A. Leiter,<sup>2</sup> Ofri Mosenzon,<sup>1</sup>  
Sabina A. Murphy,<sup>3</sup> Erica L. Goodrich,<sup>3</sup>  
Ilan Yanuv,<sup>1</sup> Aliza Rozenberg,<sup>1</sup>  
Deepak L. Bhatt,<sup>4</sup> Darren K. McGuire,<sup>5,6</sup>  
John P.H. Wilding,<sup>7</sup>  
Ingrid A.M. Gause-Nilsson,<sup>8</sup>  
Anna Maria Langkilde,<sup>8</sup>  
Marc S. Sabatine,<sup>3</sup>  
and Stephen D. Wiviott<sup>3</sup>

## OBJECTIVE

International guidelines propose prescribing sodium–glucose cotransporter 2 (SGLT2) inhibitors to patients with type 2 diabetes (T2D) as secondary prevention in patients with established atherosclerotic cardiovascular disease (ASCVD) or for primary prevention of cardiovascular events in high-risk patients with multiple risk factors (MRF) for ASCVD. The current analyses expand on the cardiovascular renal and metabolic effects of SGLT2 inhibitors in MRF patients.

## RESEARCH DESIGN AND METHODS

In DECLARE-TIMI 58, 17,160 patients with T2D and MRF (59.4%) or established ASCVD (40.6%) were randomized to dapagliflozin versus placebo; patients were followed for a median of 4.2 years. The cardiovascular and renal outcomes in the MRF cohort were studied across clinically relevant subgroups for treatment effect and subgroup-based treatment interaction.

## RESULTS

Among patients with MRF, the reduction with dapagliflozin in risk of cardiovascular death or hospitalization for heart failure (CVD/HHF) (hazard ratio [HR] 0.84, 95% CI 0.67–1.04) and the renal-specific outcome (HR 0.51, 95% CI 0.37–0.69) did not differ from that for patients with ASCVD ( $P_{\text{interaction}}$  0.99 and 0.72, respectively). The effect on CVD/HHF was entirely driven by a reduction in HHF (HR 0.64, 95% CI 0.46–0.88). The benefits of dapagliflozin on HHF and on the renal-specific outcome, among the subset with MRF, were directionally consistent across clinically relevant subgroups. At 48 months, HbA<sub>1c</sub>, weight, systolic blood pressure, and urinary albumin–to–creatinine ratio were lower with dapagliflozin versus placebo and estimated glomerular filtration rate was higher ( $P < 0.001$ ).

## CONCLUSIONS

In patients with T2D and MRF, dapagliflozin reduced the risk of HHF and adverse renal outcomes regardless of baseline characteristics. These analyses support the benefit of dapagliflozin for important outcomes in a broad primary prevention population.

<sup>1</sup>Diabetes Unit, Department of Endocrinology and Metabolism, Hadassah Medical Center, and The Faculty of Medicine, Hebrew University of Jerusalem, Jerusalem, Israel

<sup>2</sup>Li Ka Shing Knowledge Institute, St. Michael's Hospital, University of Toronto, Toronto, Canada

<sup>3</sup>TIMI Study Group, Division of Cardiovascular Medicine, Brigham and Women's Hospital and Harvard Medical School, Boston, MA

<sup>4</sup>Division of Cardiovascular Medicine, Brigham and Women's Hospital and Harvard Medical School, Boston, MA

<sup>5</sup>Division of Cardiology, Department of Internal Medicine, University of Texas Southwestern Medical Center, Dallas, TX

<sup>6</sup>Parkland Health and Hospital System, Dallas, TX

<sup>7</sup>Department of Cardiovascular and Metabolic Medicine, Institute of Life Course and Medical Sciences, University of Liverpool, Liverpool, U.K.

<sup>8</sup>BioPharmaceuticals R&D, AstraZeneca, Gothenburg, Sweden

Corresponding author: Avivit Cahn, [avivit@hadassah.org.il](mailto:avivit@hadassah.org.il)

Received 8 October 2020 and accepted 31 January 2021

Clinical trial reg. no. NCT01730534, [clinicaltrials.gov](https://clinicaltrials.gov)

This article contains supplementary material online at <https://doi.org/10.2337/figshare.13692655>.

This article is featured in a podcast available at <https://www.diabetesjournals.org/content/diabetes-core-update-podcasts>.

© 2021 by the American Diabetes Association. Readers may use this article as long as the work is properly cited, the use is educational and not for profit, and the work is not altered. More information is available at <https://www.diabetesjournals.org/content/license>.

Sodium–glucose cotransporter 2 (SGLT2) inhibitors have been approved for the treatment of type 2 diabetes (T2D) since 2012. Early clinical trials with these agents demonstrated their capacity not only for lowering glucose but also for reducing weight and blood pressure, thus addressing several important components of the metabolic syndrome (1). The Empagliflozin Cardiovascular Outcome Event Trial in Type 2 Diabetes Mellitus Patients (EMPA-REG OUTCOME), the first published cardiovascular outcome trial (CVOT) of a drug in the class, revolutionized our view of management of T2D by demonstrating significant reduction in risk for major adverse cardiovascular events (MACE) and cardiovascular death or hospitalization for heart failure (CVD/HHF), as well as significant reduction in the occurrence of adverse renal outcomes (2,3). Subsequently, published CVOTs demonstrated some heterogeneity with respect to SGLT2 inhibitor effects on MACE and cardiovascular death, yet the effects on HHF and renal outcomes were largely consistent (4–7). Still, all patients included in the studies of empagliflozin and ertugliflozin and most of the patients included in the canagliflozin program had established atherosclerotic cardiovascular disease (ASCVD), thus limiting our ability to extrapolate the effects of these drugs on populations without established ASCVD, which include the majority of patients with T2D (8,9).

In the CVOT Dapagliflozin Effect on Cardiovascular Events trial (DECLARE-TIMI 58) with dapagliflozin versus placebo, 59.4% of the patients had multiple risk factors (MRF) but not established ASCVD. This large primary prevention cohort ( $N = 10,146$ ) represents a broad T2D population with respect to the number of cardiovascular risk factors, age, disease duration, and renal function. Thus, this trial affords a unique opportunity to assess the effects of an SGLT2 inhibitor in a population with T2D without prevalent ASCVD (6,10).

In the overall trial, dapagliflozin demonstrated a reduction in one of the dual primary composite outcomes of CVD/HHF (hazard ratio [HR] 0.83, 95% CI 0.73–0.95), driven by a reduction in HHF, and also met the prespecified criterion for noninferiority but did not achieve statistically significant superiority with respect to the second dual primary outcome of MACE (HR 0.93, 95% CI

0.84–1.03) (6). The renal-specific outcome was significantly reduced with dapagliflozin (HR 0.53, 95% CI 0.43–0.66) (11). All outcomes were directionally consistent in the established ASCVD and the MRF groups ( $P_{\text{interaction}} > 0.05$ ) (6). In the current analysis, we focus on the MRF cohort, aiming to better characterize the cardiovascular, renal, and metabolic benefits of dapagliflozin for a broad population with varying demographic, clinical, and metabolic features.

## RESEARCH DESIGN AND METHODS

### Study Overview

In DECLARE-TIMI 58, a total of 17,160 patients were randomly assigned to receive dapagliflozin 10 mg daily or placebo and followed for a median of 4.2 years. The trial included 6,974 patients with

established ASCVD and 10,186 with MRF but without ASCVD. MRF participants were men aged  $\geq 55$  and women aged  $\geq 60$  years with at least one additional cardiovascular risk factor including dyslipidemia, hypertension, or current tobacco use. Patients with HbA<sub>1c</sub> of 6.5% to  $<12.0\%$  and creatinine clearance of  $\geq 60$  mL/min were eligible for inclusion. All patients were treated according to guidelines and regional standards of care for cardiovascular risk factors, blood pressure, lipids, antithrombotic treatment, and HbA<sub>1c</sub>. The trial protocol was approved by the institutional review board at each participating site, and all participants provided written informed consent. The design, baseline characteristics, and principal results of this study have previously been published (6,10,12).

**Table 1—Baseline characteristics of the MRF population**

|                                                         | Dapagliflozin   | Placebo         | <i>P</i> |
|---------------------------------------------------------|-----------------|-----------------|----------|
| <i>N</i>                                                | 5,108           | 5,078           |          |
| Age, years, mean (SD)                                   | 64.8 (5.7)      | 64.8 (5.6)      | 0.697    |
| Male sex, <i>N</i> (%)                                  | 2,874 (56.3)    | 2,839 (55.9)    | 0.717    |
| BMI (kg/m <sup>2</sup> ), mean (SD)                     | 32.0 (5.9)      | 32.0 (6.1)      | 0.958    |
| White, <i>N</i> (%)                                     | 4,056 (79.4)    | 4,013 (79.0)    | 0.639    |
| Diabetes duration, years, mean (SD)                     | 11.8 (7.4)      | 11.7 (7.7)      | 0.316    |
| HbA <sub>1c</sub> (%), mean (SD)                        | 8.3 (1.2)       | 8.3 (1.2)       | 0.818    |
| SBP (mmHg), mean (SD)                                   | 135.7 (15.0)    | 135.5 (15.2)    | 0.704    |
| DBP (mmHg), mean (SD)                                   | 78.4 (8.9)      | 78.4 (8.8)      | 0.550    |
| eGFR (CKD-EPI) (mL/min/1.73 m <sup>2</sup> ), mean (SD) | 85.4 (15.2)     | 85.8 (14.8)     | 0.522    |
| <60                                                     | 325 (6.4)       | 297 (5.8)       | 0.445    |
| 60 to <90                                               | 2,281 (44.7)    | 2,313 (45.5)    |          |
| $\geq 90$                                               | 2,501 (49.0)    | 2,468 (48.6)    |          |
| UACR (mg/g), median (IQR)                               | 12.2 (5.9–35.9) | 12.1 (5.8–36.7) | 0.835    |
| <30                                                     | 3,602 (71.6)    | 3,590 (71.8)    | 0.769    |
| 30–300                                                  | 1,123 (22.3)    | 1,121 (22.4)    |          |
| >300                                                    | 305 (6.1)       | 286 (5.7)       |          |
| LDL-C (mg/dL), mean (SD)                                | 91.4 (34.9)     | 91.5 (35.4)     | 0.832    |
| Number of additional risk factors, <i>N</i> (%)         |                 |                 |          |
| One                                                     | 1,440 (28.2)    | 1,422 (28.0)    | 0.770    |
| Two                                                     | 3,257 (63.8)    | 3,263 (64.3)    |          |
| Three                                                   | 406 (8.0)       | 386 (7.6)       |          |
| History of heart failure, <i>N</i> (%)                  | 268 (5.2)       | 300 (5.9)       | 0.146    |
| Dyslipidemia, <i>N</i> (%)                              | 3,745 (73.3)    | 3,782 (74.5)    | 0.182    |
| Hypertension, <i>N</i> (%)                              | 4,692 (91.9)    | 4,595 (90.5)    | 0.015    |
| Current tobacco use, <i>N</i> (%)                       | 735 (14.4)      | 729 (14.4)      | 0.962    |
| Baseline medications                                    |                 |                 |          |
| Insulin, <i>N</i> (%)                                   | 1,948 (38.1)    | 1,873 (36.9)    | 0.192    |
| Antiplatelet, <i>N</i> (%)                              | 2,221 (43.5)    | 2,231 (43.9)    | 0.644    |
| ACE/ARB, <i>N</i> (%)                                   | 4,123 (80.7)    | 4,092 (80.6)    | 0.864    |
| MRA, <i>N</i> (%)                                       | 123 (2.4)       | 145 (2.9)       | 0.158    |
| $\beta$ -Blocker, <i>N</i> (%)                          | 1,969 (38.5)    | 1,992 (39.2)    | 0.481    |
| Statin or ezetimibe, <i>N</i> (%)                       | 3,395 (66.5)    | 3,414 (67.2)    | 0.411    |

ARB, angiotensin receptor blocker; CKD-EPI, Chronic Kidney Disease Epidemiology Collaboration; DBP, diastolic blood pressure; IQR, interquartile range; LDL-C, LDL cholesterol; MRA, mineralocorticoid receptor agonists.

## Assessment of Outcomes

The dual primary composite efficacy outcomes were CVD/HHF and MACE (the composite of cardiovascular death, myocardial infarction, and ischemic stroke). A renal-specific composite outcome included a sustained decrease of 40% or more in estimated glomerular filtration rate (eGFR) to  $<60$  mL/min/ $1.73$  m<sup>2</sup>, end-stage renal disease, or death from renal cause. Additional outcomes included the components of the primary outcomes and all-cause mortality.

## Statistical Analysis

Baseline characteristics are reported as frequencies and percentages for categorical variables and as mean and SD or median (interquartile range) for continuous variables. Baseline and efficacy analyses were performed on an intention-to-treat basis. Safety analyses were performed with use of the on-treatment analysis set, as previously described, except for amputation, fracture, and malignancy outcomes, which included all events after first dose in all patients who were randomized and received at least one dose of study drug.

We calculated the effect of dapagliflozin on the incidence of the efficacy outcome within each subgroup using Cox regression models that included the randomization stratification factor of baseline hematuria, and we report the HRs and 95% CIs. To test for heterogeneity of effect, we included an interaction term in the Cox regression model.

The least squares (LS) mean  $\pm$  SE values of HbA<sub>1c</sub>, weight, systolic blood pressure (SBP), diastolic blood pressure, eGFR, and urinary albumin-to-creatinine ratio (UACR) with dapagliflozin versus placebo during the trial in the MRF group are graphically shown. Mixed models for repeated measures were analyzed for comparison of change from baseline by treatment group at month 48. All urine albumin values  $<7.0$  mg/L were imputed to a value of 7 mg/g UACR, which was the lowest detectable level of the assay used in the latter part of the trial. Since UACR did not follow a normal distribution, UACR data were log transformed before analysis. LS means and SE were back transformed to the original scale.

There was no statistical adjustment for multiple comparisons. A *P* value

$<0.05$  was considered statistically significant.

All analyses were performed with SAS software, version 9.4 (SAS Institute, Cary, NC) and Stata, version 16.1 (College Station, TX).

## RESULTS

### Baseline Characteristics

A total of 10,186 MRF patients were included in these analyses. Their baseline characteristics are shown in Table 1. There were 5,713 (56.1%) males, and the mean  $\pm$  SD age was  $64.8 \pm 5.6$  years, BMI  $32.0 \pm 6.0$  kg/m<sup>2</sup>, and baseline HbA<sub>1c</sub>  $8.3 \pm 1.2\%$ . Heart failure at baseline was noted in 568 (5.6%)

patients, and 622 (6.1%) had an eGFR  $<60$  mL/min/ $1.73$  m<sup>2</sup>.

### Cardiovascular and Renal Outcomes

Among patients with MRF, the reduction with dapagliflozin in risk of CVD/HHF (HR 0.84, 95% CI 0.67–1.04) did not differ from that seen in patients with ASCVD (*P*<sub>interaction</sub> 0.99). The effect on CVD/HHF was entirely driven by a reduction in HHF (HR 0.64, 95% CI 0.46–0.88) (Fig. 1A). HHF was reduced with dapagliflozin versus placebo in MRF patients, with no heterogeneity across subgroups assessed (*P*<sub>interaction</sub>  $> 0.05$ ) (Fig. 2A). MACE was balanced with dapagliflozin versus placebo in the MRF patients (HR 1.01, 95% CI 0.86–1.20), consistent with

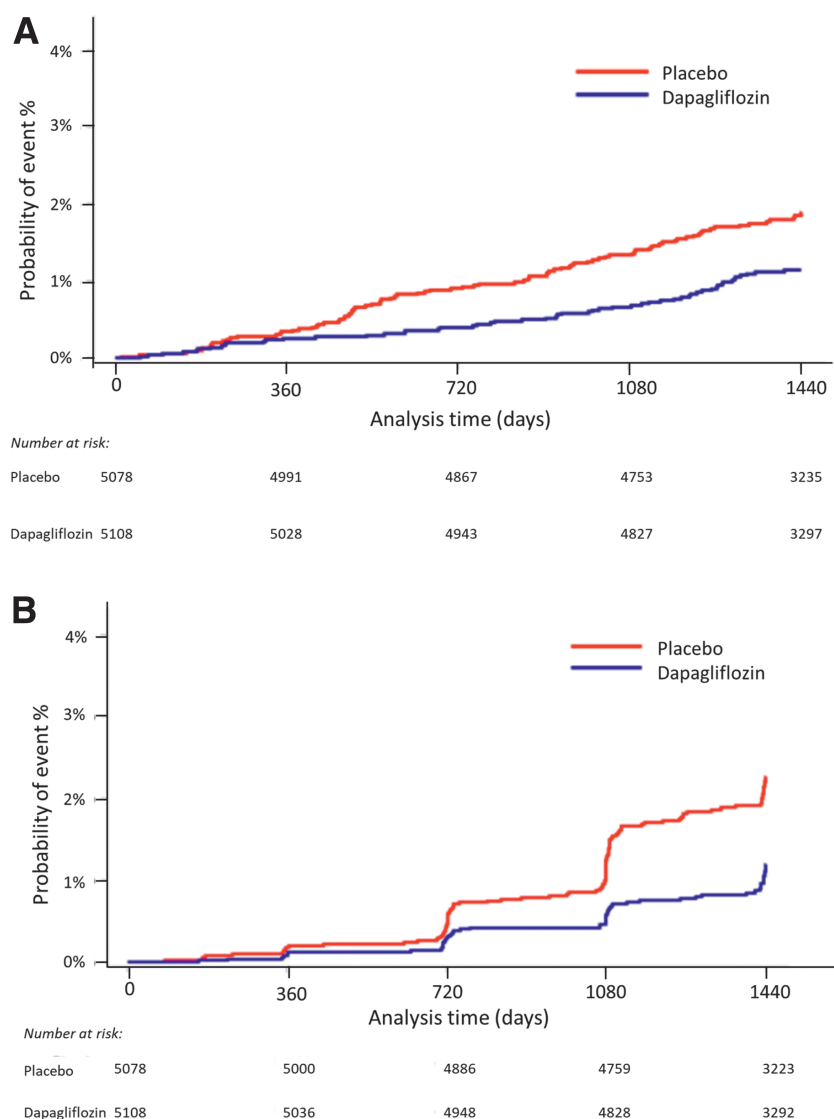

**Figure 1**—A: Hospitalization for heart failure in the MRF cohort with dapagliflozin versus placebo. B: The renal-specific outcome in the MRF cohort with dapagliflozin versus placebo.

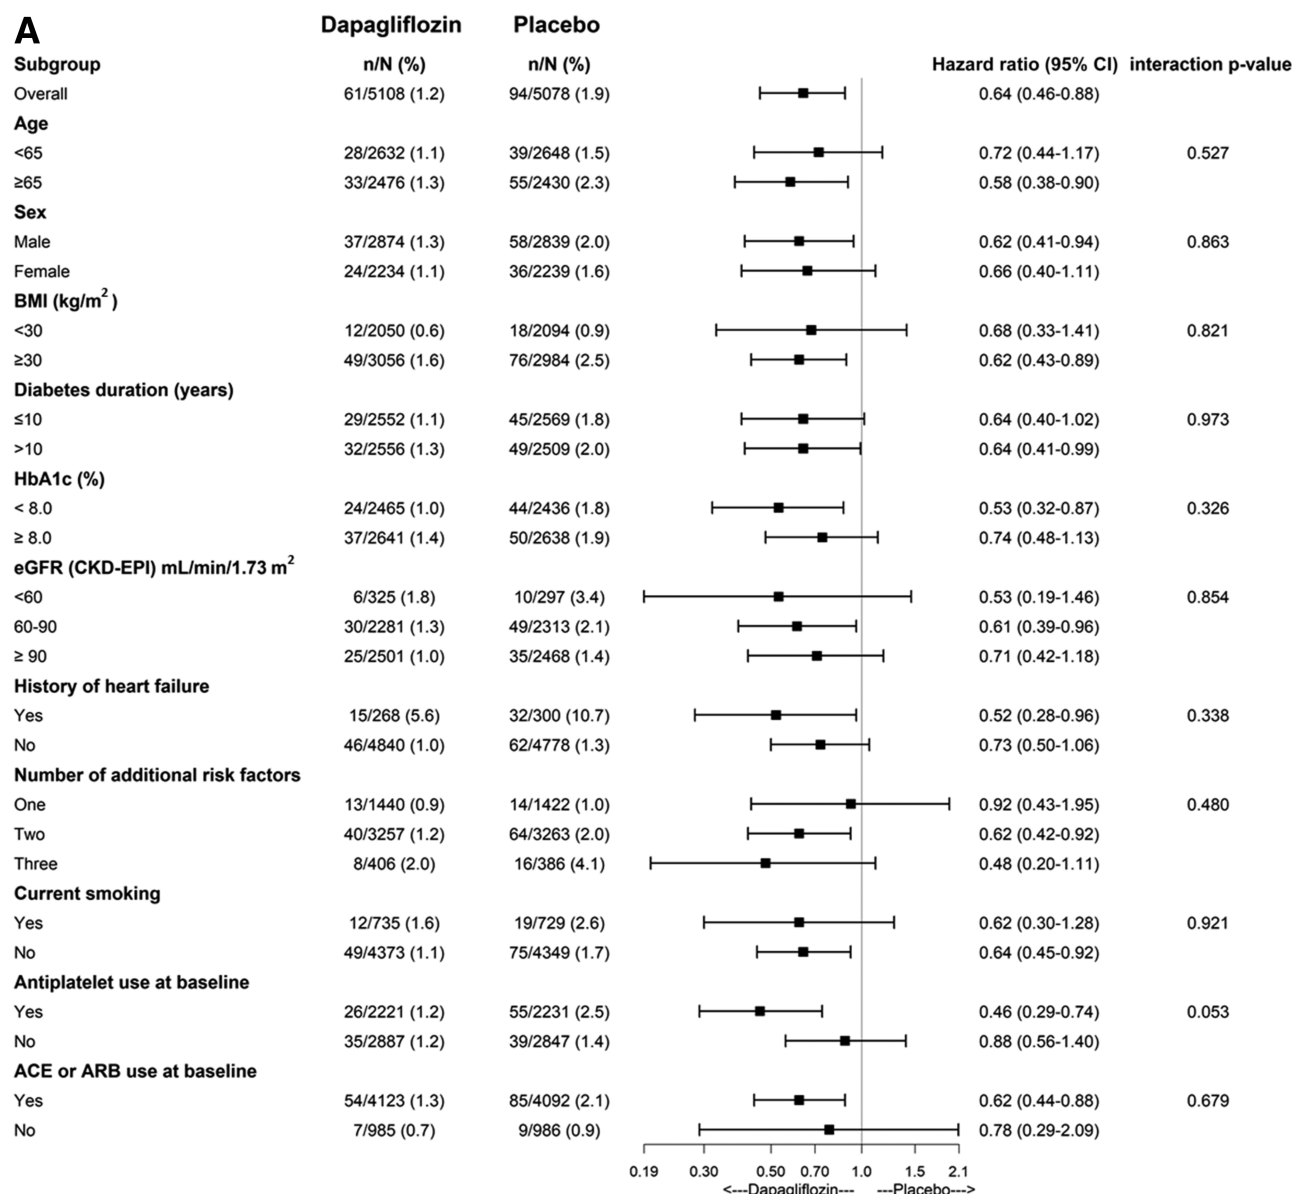

**Figure 2**—A: Hospitalization for heart failure in the MRF cohort by subgroups. B: Renal-specific outcome in the MRF cohort by subgroups. Age is presented in years. ARB, angiotensin receptor blocker; CKD-EPI, Chronic Kidney Disease Epidemiology Collaboration.

observations in the established ASCVD cohort ( $P_{\text{interaction}} = 0.25$ ).

The risk of the renal-specific outcome was reduced with dapagliflozin versus placebo in the MRF group (HR 0.51, 95% CI 0.37–0.69) (Fig. 1B) and the magnitude of the risk reduction did not differ from that in patients with ASCVD ( $P_{\text{interaction}} = 0.72$ ). This observed reduction was consistent across all subgroups assessed (Fig. 2B), with a nominally greater benefit of dapagliflozin observed in current smokers versus nonsmokers, but note that the subgroup of current smokers and, hence, the number of events were very small.

### Metabolic Outcomes

At 48 months, LS mean  $\pm$  SE for patients randomized to dapagliflozin versus placebo was lower for HbA<sub>1c</sub> ( $7.79 \pm 0.04$  vs.  $8.03 \pm 0.04\%$ ), weight ( $85.76 \pm 0.14$  vs.  $87.86 \pm 0.14$  kg), SBP ( $132.96 \pm 0.37$  vs.  $135.32 \pm 0.37$  mmHg), and UACR ( $22.53 \pm 1.03$  vs.  $27.42 \pm 1.03$  mg/g) and higher for eGFR ( $77.21 \pm 0.31$  vs.  $75.62 \pm 0.31$  mL/min/1.73 m<sup>2</sup>). There was a significant difference in change from baseline for dapagliflozin versus placebo for all measurements ( $P < 0.001$ ) (Fig. 3).

### Safety Outcomes

In the MRF group, there were fewer patients with a serious adverse event or

with major hypoglycemia with dapagliflozin versus placebo. Genital infections and diabetic ketoacidosis were increased consistent with the known safety profile of the class. Additional safety outcomes including amputations, fractures, volume depletion, acute kidney injury, urinary tract infection, and cancer were balanced with dapagliflozin versus placebo (Supplementary Table 1).

### CONCLUSIONS

This post hoc analysis of the large primary prevention cohort (MRF) in DECLARE-TIMI 58 delineates the benefits of dapagliflozin in patients without



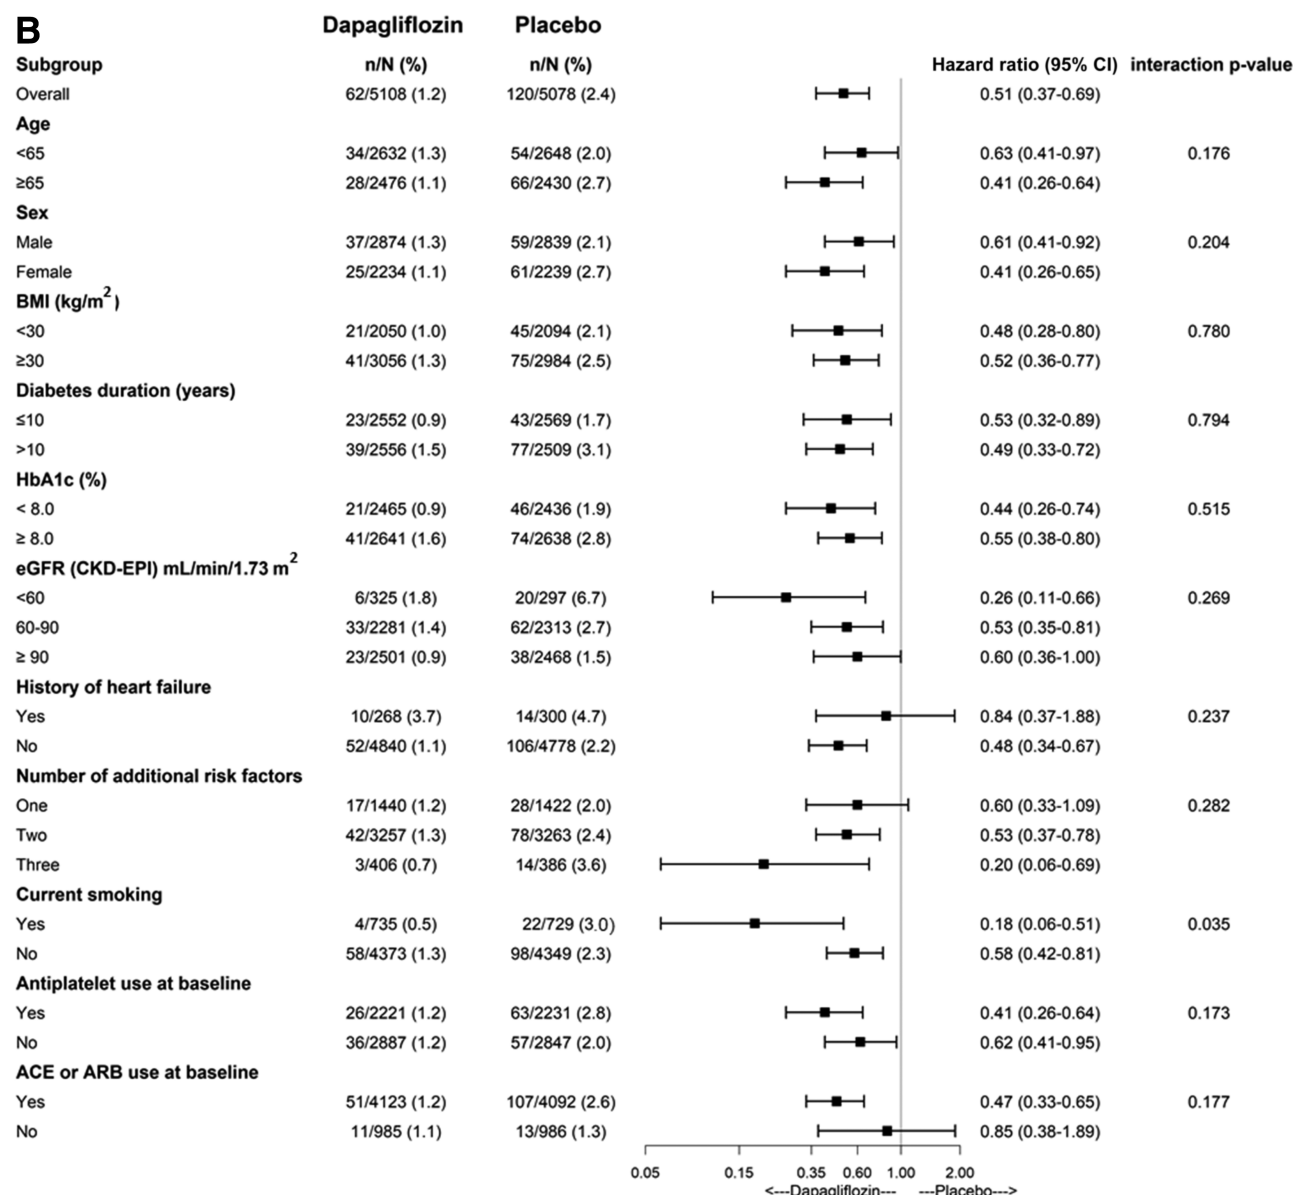

Figure 2—Continued

established ASCVD. The reduction in HHF and in adverse renal outcomes that was observed in the overall study population was consistently observed in the MRF group irrespective of age, sex, diabetes duration, current smoking, HbA<sub>1c</sub>, eGFR, history of heart failure, number of additional cardiovascular risk factors, and baseline medications. Moreover, in line with the overall study data, no new safety signals emerged in this cohort, and the metabolic benefits known for the class were observed as well.

In recent years, with accumulating data from cardiovascular and renal outcome trials of SGLT2 inhibitors, the position of these agents in the treatment algorithm of patients with T2D has

been under extensive discussion (13–15). Trials of SGLT2 inhibitors have demonstrated consistent metabolic benefits in patients with T2D with clinically significant reductions in HbA<sub>1c</sub>, blood pressure, and weight, irrespective of baseline cardiovascular risk. The cardiovascular and renal benefits of the class were initially assessed in a mostly secondary prevention population; however, the large primary prevention population in DECLARE-TIMI 58 has enabled closer scrutiny of the benefits of dapagliflozin in this patient cohort.

In determination of the treatment regimen for patients with T2D, particularly in the case of lower risk patients without established ASCVD, several factors

should be considered. T2D usually occurs in the constellation of the metabolic syndrome, with obesity, hypertension, and dyslipidemia being important comorbidities. Multifactorial intervention targeting several cardiovascular risk factors, particularly when implemented in the early stages of T2D, is thus of paramount importance (16). The unique mode of action of SGLT2 inhibitors, which is insulin independent, yields metabolic advantages in early as well as progressive T2D, when endogenous insulin reserves may have diminished. Our analyses of the large primary prevention population in the trial demonstrate a sustained benefit of dapagliflozin versus placebo added to standard of care in reducing HbA<sub>1c</sub>

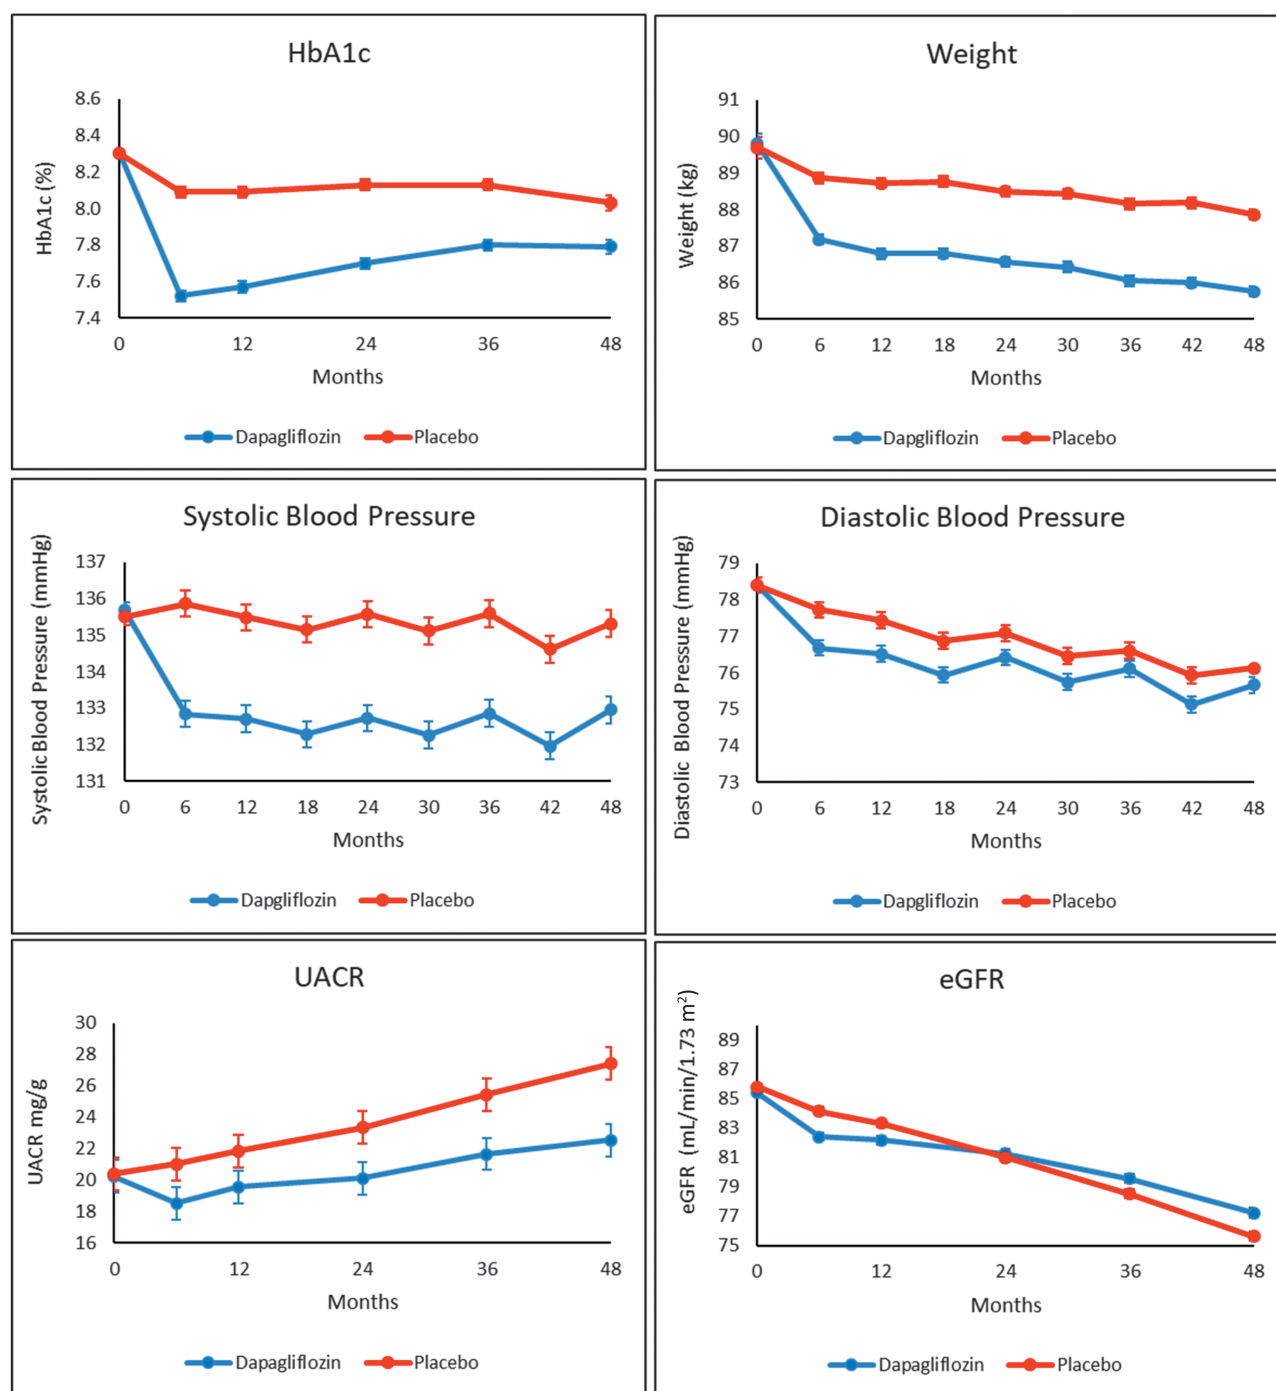

**Figure 3**—Metabolic outcomes in the MRF cohort. Data shown are LS mean  $\pm$  SE. eGFR, estimated glomerular filtration rate; UACR, urinary albumin creatinine ratio.

weight, and blood pressure. Long-term benefits can be expected in slowing of diabetes progression by maintenance of HbA<sub>1c</sub> reduction and reducing microvascular complications as well as decreasing cardiovascular complications (17–20).

Besides control of the “standard” cardiovascular risk factors (obesity, hypertension, dyslipidemia, dysglycemia), the

clinical relevance of the cardio-renal axis is becoming increasingly apparent (21). Reduced eGFR and increased albuminuria lead to a synergistic increase in the risk of cardiovascular events (22,23). SGLT2 inhibitors have consistently demonstrated improvements in renal outcomes. These include both reversal of preexisting albuminuria and reduced conversion

from normo- to micro- or macroalbuminuria. Moreover, SGLT2 inhibitors have been shown to slow the decline in eGFR and lead to a significant reduction in end-stage renal disease (3,9,11,24,25). These benefits have been observed in those with and without baseline chronic kidney disease (CKD) and regardless of established ASCVD (5).

In the current analysis, adverse renal outcomes have been markedly reduced with dapagliflozin, along with a marked decline in albuminuria. The renal-specific outcome was reduced irrespective of baseline cardiovascular or renal risk and consistently across all risk categories in the MRF population. These data further support the role of dapagliflozin in early, primary prevention of adverse renal outcomes (11).

HHF was also significantly reduced with dapagliflozin in the present analyses—also in lower-risk patients with no heterogeneity based on age, sex, smoking, BMI, diabetes duration, HbA<sub>1c</sub>, eGFR, history of heart failure, baseline medications, or number of additional risk factors. The pivotal role of heart failure in the prognosis of patients with diabetes is becoming increasingly apparent, and the role of dapagliflozin in the primary prevention of HHF in patients with T2DM is of utmost importance (26,27).

The American Diabetes Association 2021 *Standards of Medical Care in Diabetes* propose prescribing SGLT2 inhibitors with evidence of reducing heart failure and/or CKD progression, independently of HbA<sub>1c</sub> levels and use of metformin, to patients in whom heart failure or CKD predominates (14). Yet, these benefits were observed in our study irrespective of preexisting heart failure or CKD, and consistently across risk categories, suggesting that these recommendations may be expanded to a broader population with T2D.

The European Society of Cardiology 2019 guidelines propose prescribing SGLT2 inhibitors to patients with T2D and cardiovascular disease or at high or very high cardiovascular risk (13). Additionally, the 2019 American College of Cardiology/American Heart Association Guideline on the Primary Prevention of Cardiovascular Disease proposes initiating SGLT2 inhibitors or glucagon like peptide-1 receptor agonists in patients with T2D and additional cardiovascular risk factors (15). This definition is reflective of the broad inclusion criteria of DECLARE-TIMI 58.

The CREDENCE (Canagliflozin and Renal Events in Diabetes with Established Nephropathy Clinical Evaluation) trial which included patients with type 2 diabetes and albuminuric chronic kidney disease showed no

evidence of heterogeneity on the effects of MACE in patients with and without ASCVD (8). Notably, MACE reduction was noted for glucagon like peptide-1 receptor agonists as well, with no heterogeneity in primary versus secondary prevention populations (28,29). These results were mainly driven by data from the CVOT of dulaglutide Researching Cardiovascular Events With a Weekly INcretin in Diabetes (REWIND), which included a large primary prevention population (30). However, though relative risk reduction was consistent in both classes in primary and secondary prevention populations, absolute risk reduction was smaller in the lower-risk populations, and individualized decision-making is recommended.

Safety is an important consideration for a drug intended for use early in the disease, as long-term exposure is expected. In that respect, the safety profile of dapagliflozin, which we extensively reviewed in our previous analysis, was consistently observed in the MRF population, providing further reassurance regarding the early use of this agent (31).

Recent data have expanded the role of dapagliflozin from the prevention of HHF and adverse renal outcomes to the treatment of these conditions once established. The Dapagliflozin And Prevention of Adverse outcomes in Heart Failure (DAPA-HF) trial demonstrated a reduction in HHF in patients with heart failure and reduced ejection fraction with or without diabetes (32). Notably, a reduction in HHF in patients with heart failure and reduced ejection fraction was also observed with empagliflozin and was likewise unrelated to baseline diabetes status (33). Moreover, a reduction in adverse renal outcomes with dapagliflozin in patients with established CKD has been shown in the Dapagliflozin And Prevention of Adverse outcomes in Chronic Kidney Disease (DAPA-CKD) study, and the benefit was observed irrespective of preexisting diabetes (34).

The strengths of our analyses are the inclusion of a large, broad population of patients with T2D at high risk for cardiovascular disease. Our study further expands on different levels of risk within this population as defined by clinically relevant subgroups. However, several

limitations to our analyses should be considered. First, as is generally noted in subgroup analyses, the trial was not powered to detect all possible event reductions and treatment-by-subgroup interactions. Furthermore, although the comparison of results in ASCVD vs. MRF patients was pre-specified, the analyses of subgroups within the MRF patients are post hoc and no adjustment was made for multiple comparisons; thus, these data should be considered as hypothesis generating. Finally, creatinine clearance <60 mL/min was an exclusion criterion in the study, limiting our ability to draw conclusions on this specific high-risk, primary prevention population.

In conclusion, extensive early clinical data show the beneficial glucose-, weight-, and blood pressure-lowering effects of dapagliflozin in patients at all stages of T2D. The current analyses highlight the benefits of dapagliflozin in the prevention of HHF and adverse renal outcomes across a broad risk continuum of a primary prevention population with T2D. Expected outcomes of dapagliflozin treatment include long-term metabolic benefits (glucose, weight, blood pressure, and albuminuria) as well as primary prevention of HHF and adverse renal outcomes. Moreover, dapagliflozin's overall favorable safety profile places it as an appropriate option early in the disease for patients with T2D.

**Duality of Interest.** The sponsor of DECLARE-TIMI 58 was initially AstraZeneca and Bristol-Myers Squibb, and AstraZeneca later became the sole sponsor of the study. DECLARE-TIMI 58 was a collaboration between the funder and two academic research organizations (TIMI Study Group and Hadassah Medical Organization). The funder was involved in the study design, data collection, data analysis, interpretation, and writing of this report. Data analyses were done by the academic TIMI Study Group, which has access to the complete study database, allowing independent analyses of the results, and any discrepancies were resolved by discussion. The DECLARE-TIMI 58 publication committee made the decision to submit for publication.

A.C. reports grants and personal fees from AstraZeneca and Novo Nordisk and personal fees from Abbott, Eli Lilly, Sanofi, Boehringer Ingelheim, Merck Sharp & Dohme, Medial Early-Sign, and GlucoMe. I.R. reports personal fees from AstraZeneca, Bristol-Myers Squibb, Boehringer Ingelheim, Concenter BioPharma and Silkim, Eli Lilly, Merck Sharp & Dohme, Novo Nordisk, Orgenesis, Pfizer, Sanofi,

SmartZyme Innovation, Panaxia, FuturRx, Insuline Medical, Medial EarlySign, CameraEyes, Exscopia, Dermal Biomics, Johnson & Johnson, Novartis, Teva, GlucoMe, and DarioHealth. L.A.L. reports grants and personal fees from AstraZeneca, Boehringer Ingelheim, Eli Lilly, Janssen, Novo Nordisk, and Sanofi; personal fees from Merck and Servier; and grants from GlaxoSmithKline and Lexicon. O.M. reports grants and personal fees from AstraZeneca, Bristol-Myers Squibb, and Novo Nordisk and personal fees from Eli Lilly, Sanofi, Merck Sharp & Dohme, Boehringer Ingelheim, Johnson & Johnson, and Novartis. S.A.M. and E.L.G. report research grant support through Brigham and Women's Hospital from Abbott, Amgen, Aralez, AstraZeneca, Bayer HealthCare Pharmaceuticals, Daiichi-Sankyo, Eisai, GlaxoSmithKline, Intarcia, Janssen, MedImmune, Merck, Novartis, Pfizer, Poxel, Quark Pharmaceuticals, Roche, Takeda, The Medicines Company, and Zora Biosciences. D.L.B. discloses the following relationships: advisory board, Cardax, CellProthera, Cereno Scientific, Elsevier Practice Update Cardiology, Level Ex, Medscape Cardiology, PhaseBio, PLx Pharma, and Regado Biosciences; board of directors, Boston VA Research Institute, Society of Cardiovascular Patient Care, TobeSoft; chair, American Heart Association Quality Oversight Committee; data monitoring committees, Baim Institute for Clinical Research (formerly Harvard Clinical Research Institute, for the PORTICO trial, funded by St. Jude Medical, now Abbott), Cleveland Clinic (including for the EXCEED trial, funded by Edwards), Contego Medical (Chair, PERFORMANCE 2), Duke Clinical Research Institute, Mayo Clinic, Mount Sinai School of Medicine (for the ENVISAGE trial, funded by Daiichi Sankyo), and Population Health Research Institute; honoraria, American College of Cardiology (Senior Associate Editor, Clinical Trials and News, ACC.org; Vice-Chair, ACC Accreditation Committee), Baim Institute for Clinical Research (formerly Harvard Clinical Research Institute; RE-DUAL PCI clinical trial steering committee funded by Boehringer Ingelheim; AEGIS-II executive committee funded by CSL Behring), Belvoir Publications (Editor in Chief, Harvard Heart Letter), Duke Clinical Research Institute (clinical trial steering committees, including for the PRO-NOUNCE trial, funded by Ferring Pharmaceuticals), HMP Global (Editor in Chief, Journal of Invasive Cardiology), Journal of the American College of Cardiology (Guest Editor; Associate Editor), K2P (Co-Chair, interdisciplinary curriculum), Level Ex, Medtelligence/ReachMD (CME steering committees), MJH Life Sciences, Population Health Research Institute (for the COMPASS operations committee, publications committee, steering committee, and USA national co-leader, funded by Bayer), Slack Publications (Chief Medical Editor, Cardiology Today's Intervention), Society of Cardiovascular Patient Care (Secretary/Treasurer), and WebMD (CME steering committees); other, Clinical Cardiology (Deputy Editor), NCDRACTION Registry Steering Committee (Chair), and VA CART Research and Publications Committee (Chair); research funding, Abbott, Afimmune, Amarin, Amgen, AstraZeneca,

Bayer, Boehringer Ingelheim, Bristol-Myers Squibb, Cardax, Chiesi, CSL Behring, Eisai, Ethicon, Ferring Pharmaceuticals, Forest Laboratories, Fractyl, Idorsia, Ironwood, Ischemix, Lexicon, Lilly, Medtronic, Pfizer, PhaseBio, PLx Pharma, Regeneron, Roche, Sanofi Aventis, Synaptic, and The Medicines Company; royalties, Elsevier (Editor, Cardiovascular Intervention: A Companion to Braunwald's Heart Disease); site co-investigator, Biotronik, Boston Scientific, CSI, St. Jude Medical (now Abbott), Svelte; trustee, American College of Cardiology; unfunded research: FlowCo, Merck, Novo Nordisk, and Takeda. D.K.M. discloses the following relationships: personal fees for clinical trial leadership from GlaxoSmithKline, Janssen, Lexicon, AstraZeneca, Sanofi, Boehringer Ingelheim, Merck & Co, Pfizer, Novo Nordisk, Eisai, Esperion, and Lilly USA and personal fees for consultancy from AstraZeneca, Lilly USA, Boehringer Ingelheim, Merck & Co, Novo Nordisk, Metavant, Applied Therapeutics, Sanofi, and Afimmune. J.P.H.W., outside the submitted work, has received grants, personal fees for lectures, and consultancy fees (paid to his institution) from AstraZeneca and Novo Nordisk; personal fees for lectures and consultancy fees (paid to his institution) from Boehringer Ingelheim, Janssen, Lilly, Mundipharma, Napp, Sanofi, and Takeda; and consultancy fees (paid to his institution) from Rhythm Pharmaceuticals and Wilmington Healthcare. I.A.M.G.-N. and A.M.L. are employees of AstraZeneca. M.S.S. reports consulting fees from Althera, grants and consulting fees from Amgen, grants and consulting fees from Anthos Therapeutics, grants and consulting fees from AstraZeneca, grants from Bayer, consulting fees from Bristol-Myers Squibb, consulting fees from CVS Caremark, grants from Daiichi-Sankyo, consulting fees from DalCor, consulting fees from Dynamix, grants from Eisai, consulting fees from Esperion, grants from GlaxoSmithKline, consulting fees from IFM Therapeutics, grants and consulting fees from Intarcia, consulting fees from Ionis, grants and consulting fees from Janssen Research and Development, grants and consulting fees from The Medicines Company, grants and consulting fees from MedImmune, grants and consulting fees from Merck, grants and consulting fees from Novartis, grants from Pfizer, grants from Poxel, grants from Quark Pharmaceuticals, and grants from Takeda and is a member of the TIMI Study Group, which has also received institutional research grant support through Brigham and Women's Hospital from Abbott, Aralez, Roche, and Zora Biosciences. S.D.W. discloses grants from AstraZeneca, Bristol-Myers Squibb, Sanofi, and Amgen; grants and personal fees from Arena, Daiichi Sankyo, Eisai, Eli Lilly, and Janssen; grants and consulting fees from Merck (additionally his spouse is employed by Merck); and personal fees from Aegerion, Allergan, AngelMed, Boehringer Ingelheim, Boston Clinical Research Institute, Icon Clinical, Lexicon, St. Jude Medical, Xoma, Servier, AstraZeneca, and Bristol-Myers Squibb. No other potential conflicts of interest relevant to this article were reported.

**Author Contributions.** A.C., I.R., I.A.M.G.-N., A.M.L., M.S.S., and S.D.W. contributed to the study design. A.C., I.R., I.A.M.G.-N., A.M.L., M.S.S., and S.D.W. did the literature search. A.C., I.R., S.A.M., E.L.G., I.Y., A.R., I.A.M.G.-N., A.M.L., M.S.S., and S.D.W. designed the figures. A.C., I.R., I.A.M.G.-N., A.M.L., M.S.S., and S.D.W. contributed to data collection, and A.C., I.R., L.A.L., O.M., S.A.M., E.L.G., I.Y., A.R., D.L.B., D.K.M., J.P.H.W., I.A.M.G.-N., A.M.L., M.S.S., and S.D.W. contributed to data analysis. A.C., I.R., L.A.L., O.M., S.A.M., E.L.G., I.Y., A.R., D.L.B., D.K.M., J.P.H.W., I.A.M.G.-N., A.M.L., M.S.S., and S.D.W. contributed to data interpretation. A.C., I.R., L.A.L., O.M., S.A.M., E.L.G., I.Y., A.R., D.L.B., D.K.M., J.P.H.W., I.A.M.G.-N., A.M.L., M.S.S., and S.D.W. contributed to the writing of the report and approved the final submitted version. A.C. and S.D.W. are the guarantors of this work and, as such, had full access to all the data in the study and take responsibility for the integrity of the data and the accuracy of the data analysis.

**Prior Presentation.** Parts of this study were presented in abstract form at the 57th Annual Meeting of the European Association for the Study of Diabetes, 21–25 September 2020.

## References

1. Scheen AJ. Pharmacodynamics, efficacy and safety of sodium-glucose co-transporter type 2 (SGLT2) inhibitors for the treatment of type 2 diabetes mellitus. *Drugs* 2015;75:33–59
2. Zinman B, Wanner C, Lachin JM, et al.; EMPA-REG OUTCOME Investigators. Empagliflozin, cardiovascular outcomes, and mortality in type 2 diabetes. *N Engl J Med* 2015;373:2117–2128
3. Wanner C, Inzucchi SE, Lachin JM, et al.; EMPA-REG OUTCOME Investigators. Empagliflozin and progression of kidney disease in type 2 diabetes. *N Engl J Med* 2016;375:323–334
4. Neal B, Perkovic V, Mahaffey KW, et al.; CANVAS Program Collaborative Group. Canagliflozin and cardiovascular and renal events in type 2 diabetes. *N Engl J Med* 2017;377:644–657
5. Zelniker TA, Wiviott SD, Raz I, et al. SGLT2 inhibitors for primary and secondary prevention of cardiovascular and renal outcomes in type 2 diabetes: a systematic review and meta-analysis of cardiovascular outcome trials. *Lancet* 2019;393:31–39
6. Wiviott SD, Raz I, Bonaca MP, et al.; DECLARE-TIMI 58 Investigators. Dapagliflozin and cardiovascular outcomes in type 2 diabetes. *N Engl J Med* 2019;380:347–357
7. Cannon CP, Pratley R, Dagogo-Jack S, et al.; VERTIS CV Investigators. Cardiovascular outcomes with ertugliflozin in type 2 diabetes. *N Engl J Med* 2020;383:1425–1435
8. McGuire DK, Shih WJ, Cosentino F, et al. Association of SGLT2 inhibitors with cardiovascular and kidney outcomes in patients with type 2 diabetes: a meta-analysis. *JAMA Cardiol* 2021;6:148–158
9. Perkovic V, Jardine MJ, Neal B, et al.; CREDENCE Trial Investigators. Canagliflozin and renal outcomes in type 2 diabetes and nephropathy. *N Engl J Med* 2019;380:2295–2306
10. Raz I, Mosenzon O, Bonaca MP, et al. DECLARE-TIMI 58: participants' baseline



- characteristics. *Diabetes Obes Metab* 2018;20:1102–1110
11. Mosenzon O, Wiviott SD, Cahn A, et al. Effects of dapagliflozin on development and progression of kidney disease in patients with type 2 diabetes: an analysis from the DECLARE-TIMI 58 randomised trial [published correction appears in *Lancet Diabetes Endocrinol* 2019;7:e20]. *Lancet Diabetes Endocrinol* 2019;7:606–617
12. Wiviott SD, Raz I, Bonaca MP, et al. The design and rationale for the Dapagliflozin Effect on Cardiovascular Events (DECLARE)-TIMI 58 Trial. *Am Heart J* 2018;200:83–89
13. Cosentino F, Grant PJ, Aboyans V, et al.; ESC Scientific Document Group. 2019 ESC guidelines on diabetes, pre-diabetes, and cardiovascular diseases developed in collaboration with the EASD. *Eur Heart J* 2020;41:255–323
14. American Diabetes Association. 9. Pharmacologic approaches to glycemic treatment: *Standards of Medical Care in Diabetes—2021*. *Diabetes Care* 2021;44(Suppl. 1):S111–S124
15. Arnett DK, Blumenthal RS, Albert MA, et al. 2019 ACC/AHA guideline on the primary prevention of cardiovascular disease: a report of the American College of Cardiology/American Heart Association Task Force on Clinical Practice Guidelines. *J Am Coll Cardiol* 2019;74:e177–e232
16. Gaede P, Lund-Andersen H, Parving HH, Pedersen O. Effect of a multifactorial intervention on mortality in type 2 diabetes. *N Engl J Med* 2008;358:580–591
17. Zoungas S, Arima H, Gerstein HC, et al.; Collaborators on Trials of Lowering Glucose (CONTROL) group. Effects of intensive glucose control on microvascular outcomes in patients with type 2 diabetes: a meta-analysis of individual participant data from randomised controlled trials. *Lancet Diabetes Endocrinol* 2017;5:431–437
18. Rawshani A, Rawshani A, Franzén S, et al. Risk factors, mortality, and cardiovascular outcomes in patients with type 2 diabetes. *N Engl J Med* 2018;379:633–644
19. Holman RR, Paul SK, Bethel MA, Matthews DR, Neil HA. 10-year follow-up of intensive glucose control in type 2 diabetes. *N Engl J Med* 2008;359:1577–1589
20. Ray KK, Seshasai SR, Wijesuriya S, et al. Effect of intensive control of glucose on cardiovascular outcomes and death in patients with diabetes mellitus: a meta-analysis of randomised controlled trials. *Lancet* 2009;373:1765–1772
21. Sattar N, McGuire DK. Pathways to cardiorenal complications in type 2 diabetes mellitus: a need to rethink. *Circulation* 2018;138:7–9
22. Afkarian M, Sachs MC, Kestenbaum B, et al. Kidney disease and increased mortality risk in type 2 diabetes. *J Am Soc Nephrol* 2013;24:302–308
23. Scirica BM, Mosenzon O, Bhatt DL, et al. Cardiovascular outcomes according to urinary albumin and kidney disease in patients with type 2 diabetes at high cardiovascular risk: observations from the SAVOR-TIMI 53 trial. *JAMA Cardiol* 2018;3:155–163
24. Perkovic V, de Zeeuw D, Mahaffey KW, et al. Canagliflozin and renal outcomes in type 2 diabetes: results from the CANVAS Program randomised clinical trials. *Lancet Diabetes Endocrinol* 2018;6:691–704
25. Giugliano D, De Nicola L, Maiorino MI, Bellastella G, Esposito K. Type 2 diabetes and the kidney: insights from cardiovascular outcome trials. *Diabetes Obes Metab* 2019;21:1790–1800
26. Lytvyn Y, Bjornstad P, Udell JA, Lovshin JA, Cherney DZI. Sodium glucose cotransporter-2 inhibition in heart failure: potential mechanisms, clinical applications, and summary of clinical trials. *Circulation* 2017;136:1643–1658
27. Standl E, Schnell O, McGuire DK. Heart failure considerations of antihyperglycemic medications for type 2 diabetes. *Circ Res* 2016;118:1830–1843
28. Giugliano D, Maiorino MI, Bellastella G, Longo M, Chiodini P, Esposito K. GLP-1 receptor agonists for prevention of cardiorenal outcomes in type 2 diabetes: an updated meta-analysis including the REWIND and PIONEER 6 trials. *Diabetes Obes Metab* 2019;21:2576–2580
29. Zelniker TA, Wiviott SD, Raz I, et al. Comparison of the effects of glucagon-like peptide receptor agonists and sodium-glucose cotransporter 2 inhibitors for prevention of major adverse cardiovascular and renal outcomes in type 2 diabetes mellitus. *Circulation* 2019;139:2022–2031
30. Gerstein HC, Colhoun HM, Dagenais GR, et al.; REWIND Investigators. Dulaglutide and cardiovascular outcomes in type 2 diabetes (REWIND): a double-blind, randomised placebo-controlled trial. *Lancet* 2019;394:121–130
31. Cahn A, Raz I, Bonaca M, et al. Safety of dapagliflozin in a broad population of patients with type 2 diabetes: analyses from the DECLARE-TIMI 58 study. *Diabetes Obes Metab* 2020;22:1357–1368
32. McMurray JJV, Solomon SD, Inzucchi SE, et al.; DAPA-HF Trial Committees and Investigators. Dapagliflozin in patients with heart failure and reduced ejection fraction. *N Engl J Med* 2019;381:1995–2008
33. Packer M, Anker SD, Butler J, et al.; EMPEROR-Reduced Trial Investigators. Cardiovascular and renal outcomes with empagliflozin in heart failure. *N Engl J Med* 2020;383:1413–1424
34. Heerspink HJL, Stefánsson BV, Correa-Rotter R, et al.; DAPA-CKD Trial Committees and Investigators. Dapagliflozin in patients with chronic kidney disease. *N Engl J Med* 2020;383:1436–1446
